# Supplementary material for: Keratins as an Inflammation Trigger Point in Epidermolysis Bullosa Simplex
Source: MDPI journal article supplement (doi:10.3390/ijms222212446), 2021-11-18
Supplement: s1 [file s1]

Supplementary Table S1

| EBS subtype,<br>non-syndromic            | ORPHA \ OMIM   | Gene                                                      | Inhe<br>ritan<br>ce | Clinical features                                                                                                                                                                 | References |
|------------------------------------------|----------------|-----------------------------------------------------------|---------------------|-----------------------------------------------------------------------------------------------------------------------------------------------------------------------------------|------------|
| EBS,<br>localized<br><br><b>EBS loc.</b> | 79400 \ 131800 | <i>KRT5</i><br>(more<br>prevalen<br>t) or<br><i>KRT14</i> | AD                  | Blisters<br>localized mainly on the<br>palms and the soles,<br>life-expectancy is<br>normal                                                                                       | [111]      |
| <b>EBS -</b><br>AD-<br>intermediate,     | 79399 \ 131900 | <i>KRT5</i> or<br><i>KRT14</i>                            | AD                  | Blistering<br>generalized, not<br>severe, conditions<br>worsen in warm<br>weather, absence of<br>tonofilaments in basal<br>KCs on electron<br>microscopy                          | [8]        |
| EBS<br>severe, <b>EBS-sev</b>            | 79396 \ 131760 | <i>KRT5</i> or<br><i>KRT14</i>                            | AD                  | Early onset of<br>generalized and<br>widespread<br>blistering, tense<br>herpetiform blisters,<br>nail dystrophy,<br>palmoplantar<br>keratoderma; hyper<br>and<br>hypopigmentation | [38,44]    |

|                                                                   |              |                                                                                                      |    |                                                                                                                                                                                                                                                                                                                       |           |
|-------------------------------------------------------------------|--------------|------------------------------------------------------------------------------------------------------|----|-----------------------------------------------------------------------------------------------------------------------------------------------------------------------------------------------------------------------------------------------------------------------------------------------------------------------|-----------|
|                                                                   |              |                                                                                                      |    | with generalized and small blisters in grouped or arcuate configuration                                                                                                                                                                                                                                               |           |
| <p>EBS<br/>with mottled<br/>pigmentation</p> <p><b>EBS-MP</b></p> | 79397\131960 | <p><i>KRT5</i><br/><br/>(often)<br/><br/>or<br/><br/><i>KRT14</i><br/><br/>(less<br/>frequently)</p> | AD | <p>Upper trunk,<br/>neck and acral<br/>blistering early in<br/>childhood, mottled or<br/>reticular pigmentation<br/>distributed in a<br/>number of sites, focal<br/>punctate<br/>hyperkeratosis of the<br/>palms and soles</p>                                                                                        | [208]     |
| <p>EBS,<br/>severe <b>EBS AR</b><br/><b>sev</b></p>               | 89838\601001 | <i>KRT14</i>                                                                                         | AR | <p>Rare variant.<br/>Generalized blistering,<br/>intermediate or severe,<br/>atrophic scarring and<br/>dystrophic nails<br/>usually occur, along<br/>with focal keratoderma<br/>(palms and soles).<br/>Severe generalized<br/>blistering may cause<br/>perinatal death or<br/>persist during the<br/>entire life.</p> | [209,210] |

|                                                                                  |               |                                                           |    |                                                                                                                                                                                                                                     |                                           |
|----------------------------------------------------------------------------------|---------------|-----------------------------------------------------------|----|-------------------------------------------------------------------------------------------------------------------------------------------------------------------------------------------------------------------------------------|-------------------------------------------|
| <p>EBS intermediate with exophilin 5 deficiency</p> <p><b>EBS-AR-EXPH5</b></p>   | 412189\615028 | <i>EXPH5</i>                                              | AR | <p>Generalized or localized intermittent blistering, skin fragility, slight scarring and post-inflammatory hyperpigmentation. Clinical symptoms improve with age.</p>                                                               | [57,211]                                  |
| <p>EBS intermediate with PLEC mutations</p> <p><b>EBS-AD-PLEC (EBS-Ogna)</b></p> | 79401\131950  | <i>PLEC</i>                                               | AD | <p>Primarily acral blistering, bruisability, hemorrhagic blistering, and onychogryphosis.</p>                                                                                                                                       | [67]                                      |
| <p><b>EBS AR</b></p> <p>KRT14</p> <p>PLEC</p>                                    | 89838\601001  | <p><i>KRT14</i></p> <p><i>KRT5</i></p> <p><i>PLEC</i></p> | AR | <p>Generalized or, less frequently, localized acral blistering with early onset, palmo-plantar hyperkeratosis.</p> <p>Early mortality</p> <p>Intermediate, congenital myopathy developed after mild skin blistering in infancy.</p> | <p>[209]</p> <p>[52]</p> <p>[212,213]</p> |

|                                                                                       |               |              |    |                                                                                                                                                                                                  |           |
|---------------------------------------------------------------------------------------|---------------|--------------|----|--------------------------------------------------------------------------------------------------------------------------------------------------------------------------------------------------|-----------|
| <p>EBS<br/>with migratory<br/>circinate,</p> <p><b>EBS-migr</b></p>                   | 158681\609352 | <i>KRT5</i>  | AD | <p>Belt-like areas<br/>of erythema with<br/>multiple vesicles and<br/>small blisters, heal<br/>with brown<br/>pigmentation but no<br/>scarring</p>                                               | [214,215] |
| <p>EBS due<br/>to plakophilin<br/>deficiency,</p> <p><b>EBS-PD</b></p>                | 158668\604536 | <i>PKP1</i>  | AR | <p>Suprabasal<br/>subtype of EBS,<br/>characterized by<br/>generalized superficial<br/>erosions and less<br/>commonly blistering.</p>                                                            | [216]     |
| <p>EBS<br/>localized due to<br/>BP230<br/>deficiency,</p> <p>EBS-<br/>DST related</p> | 412181\615425 | <i>DST</i>   | AR | <p>Relatively<br/>mild blistering with<br/>acral predominance,<br/>plantar keratoderma.</p>                                                                                                      | [217]     |
| <p>EBS<br/>confined to the<br/>hands and feet</p>                                     | 147557\131800 | <i>ITGB4</i> | AD | <p>Mild blistering<br/>of hands and feet from<br/>birth, dystrophy of the<br/>nails with<br/>onychogryphosis, and<br/>enamel hypoplasia.<br/>The level of blistering<br/>was intraepidermal.</p> | [218]     |

**Group of disorder Syndromic EBS types ORPHA 595351**

Epidermolysis bullosa simplex with extracutaneous involvement

|                                                                     |               |             |    |                                                                                                                                                                                                         |       |
|---------------------------------------------------------------------|---------------|-------------|----|---------------------------------------------------------------------------------------------------------------------------------------------------------------------------------------------------------|-------|
| EBS intermediate with muscular dystrophy, EBS-MD                    | 257\226670    | <i>PLEC</i> | AR | Intermediate form with generalized blistering with mucosal involvement. In addition to skin symptoms, <i>PLEC</i> mutations cause abnormal interaction with desmin. Muscle disease with variable onset. | [66]  |
| EBS severe with pyloric atresia, or and \or muscle dystrophy EBS-PA | 158684\131950 | <i>PLEC</i> | AR | Rare form with generalized severe blistering widespread loss of skin with pyloric atresia, often fatal in infancy. In case of survival, skin fragility and nail dystrophy are life-long.                | [219] |

|                                                                         |               |                                                            |    |                                                                                                                                                                                                                                                      |       |
|-------------------------------------------------------------------------|---------------|------------------------------------------------------------|----|------------------------------------------------------------------------------------------------------------------------------------------------------------------------------------------------------------------------------------------------------|-------|
| EBS<br>intermediate<br>with<br>cardiomyopathy                           | 508529\617294 | Kelch<br>like<br>family<br>member<br>24 -<br><i>KLHL24</i> | AD | Generalized<br><br>blistering with<br>cutaneous and<br>follicular atrophy,<br>linear and stellate<br>scars, and<br>hypopigmentation.<br><br>Cardiomyopat<br>hy with heart failure in<br>young adulthood or<br>later and may have<br>lethal outcomes. | [220] |
| EBS<br>localized with<br>nephrotic<br>syndrome<br>(CD151<br>deficiency) | 412189\300333 | <i>CD151</i>                                               | AD | Widespread<br><br>blistering, particularly<br>on pretibial areas,<br>poikiloderma, nail<br>dystrophy, loss of<br>teeth, early onset<br>alopecia, and<br>esophageal webbing<br>and strictures.                                                        | [221] |

**Supplementary TableS1.** Epidermolysis Bullosa Simplex (EBS) group of disorders caused by mutations in different genes. The most prevalent forms are induced by mutation in keratin 5 and keratin 14 genes (*KRT5*, *KRT14*). Other forms are rare and include plectin (*PLEC*), exophilin 5 (*EXPH5*), Kelch-like member 24 (*KLHL24*), dystonin (*DST*), plakophilin (*PKP1*), beta-4-integrin (*ITG4*), CD151 antigen [2,44].
